# Supplementary material
Source: PubMed Central journal article supplement (PMC8246340)

## Supplementary Online Content

Machado S, Sumarsono A, Vaduganathan M. Midlife wealth mobility and long-term cardiovascular health. *JAMA Cardiol.* Published online June 30, 2021.  
doi:10.1001/jamacardio.2021.2056

**eMethods.** Subgroup Analyses of Participants at the Extremes of Wealth

**eResults.** Subgroup Analyses of Participants at the Extremes of Wealth

**eTable 1.** Combined Demographics of Participants With and Without Underlying Cardiovascular Disease

**eTable 2.** Birth Cohort-Specific Wealth Quintile Ranges by 5-Year Age Intervals

**eTable 3.** Incidence Rates of Cardiovascular Events by Starting and Ending Wealth Quintile

**eTable 4.** Incidence Proportion of Nonfatal Cardiovascular Event or Cardiovascular Death by Wealth Quintile Change

**eTable 5.** Incidence Rates and Adjusted Hazards for Nonfatal Cardiovascular Event or Cardiovascular Death by Race

**eFigure 1.** Participant Selection Flow Diagram

**eFigure 2.** Hazards of Nonfatal Cardiovascular Event or Cardiovascular Death by Magnitude of Wealth Mobility

**eFigure 3.** Hazards of Total Absolute Wealth Change (Including Housing and Nonhousing Assets and Debts) and Nonfatal Cardiovascular Event or Cardiovascular Death

**eFigure 4.** Kaplan Meier Survival Curve for Freedom From Cardiovascular Death Alone Among Participants With and Without Upward Wealth Mobility

**eFigure 5.** Hazards of Cardiovascular Death by Wealth Mobility Among Participants With Cardiovascular Disease

This supplementary material has been provided by the authors to give readers additional information about their work.

**eMethods.** Subgroup Analyses of Participants at the Extremes of Wealth

At the bottom quintile, we compared participants who began and remained in quintile #1 with 1) participants who began in quintile #1 and had upward wealth mobility and 2) participants who experienced downward wealth mobility and ended in quintile #1. Similarly, at the top quintile, we compared participants who began in and remained in quintile #5 with 1) participants who had upward wealth mobility and ended in quintile #5 and 2) participants who started in quintile #5 and experienced downward wealth mobility.

**eResults.** Subgroup Analyses of Participants at the Extremes of Wealth

*Starting or Ending in the Poorest Quintile*

Participants who started and ended in quintile #1 had 18.3 non-fatal CV events or CV deaths (95% CI: 15.8-21.4) per 1000 person-years (**Figure 3**). By comparison, participants who started in quintile #1 and experienced upward wealth mobility had a lower incidence rate of non-fatal CV events or CV deaths (-8.2 CV per 1000 person-years difference: 95% CI -12.1 to -4.3,  $P < 0.001$ ). Participants from other quintiles with downward wealth mobility to quintile #1 had similar event rates as participants stably in quintile #1 (-2.2 non-fatal CV events or CV deaths per 1000 person-years difference: 95% CI -6.7 to 2.3,  $P = 0.174$ ).

*Starting or Ending in the Wealthiest Quintile*

Participants who started and ended in quintile #5 experienced 12.5 non-fatal CV events or CV deaths per 1000 person-years (95% CI 10.9 to 14.4). There was no statistically significant difference between participants stably in quintile #5 compared with participants who started in lower quintiles and had upward wealth mobility to quintile #5 (0.3 non-fatal CV events or CV deaths per 1000 person-years difference, 95% CI -3.6 to 3.0,  $P = 0.436$ ) or participants who started in quintile 5 and had downward wealth mobility (2.3 non-fatal CV events or CV deaths per 1000 person-years difference, 95% CI -1.3 to 6.0,  $P = 0.099$ ).

**eTable 1.** Combined Demographics of Participants With and Without Underlying Cardiovascular Disease

|                                                                                                                                                            | 1931-1935     | 1936-1940      | 1941-1945      | 1946-1951     | All            |
|------------------------------------------------------------------------------------------------------------------------------------------------------------|---------------|----------------|----------------|---------------|----------------|
| Participants                                                                                                                                               | 2699          | 3490           | 1882           | 1628          | 9688           |
| Men                                                                                                                                                        | 1193 (44%)    | 1581 (45%)     | 880 (47%)      | 786 (48%)     | 4440 (46%)     |
| White                                                                                                                                                      | 2010 (75%)    | 2504 (72%)     | 1378 (73%)     | 1088 (67%)    | 6980 (72%)     |
| Black                                                                                                                                                      | 424 (16%)     | 556 (16%)      | 295 (16%)      | 291 (18%)     | 1569 (16%)     |
| Hispanic                                                                                                                                                   | 201 (8%)      | 361 (10%)      | 163 (9%)       | 192 (12%)     | 917 (9%)       |
| Other Race                                                                                                                                                 | 52 (2%)       | 69 (2%)        | 45 (2%)        | 56 (3%)       | 222 (2%)       |
| College Educated                                                                                                                                           | 457 (17%)     | 632 (18%)      | 442 (24%)      | 475 (29%)     | 2006 (21%)     |
| Married                                                                                                                                                    | 2033 (76%)    | 2794 (80%)     | 1480 (79%)     | 1171 (72%)    | 7478 (77%)     |
| Obese                                                                                                                                                      | 1135 (42%)    | 1584 (45%)     | 877 (47%)      | 678 (42%)     | 4274 (44%)     |
| Smoker                                                                                                                                                     | 497 (18%)     | 639 (18%)      | 322 (17%)      | 238 (15%)     | 1696 (18%)     |
| Mean Wealth on First Measurement, in \$1000s                                                                                                               | 276.3 (717.4) | 238.6 (664.3)  | 265.3 (791.0)  | 260.3 (674.1) | 257.9 (706.9)  |
| Mean Wealth on Second Measurement, in \$1000s                                                                                                              | 304.9 (744.1) | 306.5 (801.2)  | 368.6 (1229.2) | 308.0 (755.9) | 319.3 (889.6)  |
| Mean Wealth on Third Measurement, in \$1000s                                                                                                               |               | 371.1 (1336.8) | 412.8 (1400.5) | 325.3 (670.8) | 373.7 (1243.0) |
| Data are presented as n (%) or mean (standard deviation). Obese is defined as any measurement of body mass index >30 kg/m <sup>2</sup> between ages 50-64. |               |                |                |               |                |
| Smoker is defined as any reported tobacco use between ages 50-64.                                                                                          |               |                |                |               |                |
| Wealth is expressed in 2012 US dollars.                                                                                                                    |               |                |                |               |                |

**eTable 2.** Birth Cohort-Specific Wealth Quintile Ranges by 5-Year Age Intervals

| <b><u>Birth cohort: 1931-1935</u></b>                                                   |                    |                    |                    |
|-----------------------------------------------------------------------------------------|--------------------|--------------------|--------------------|
| <b>Quintile</b>                                                                         | <b>50-54 years</b> | <b>55-59 years</b> | <b>60-64 years</b> |
| <b>Lower to Upper Bounds of Wealth Range for Each Quintile in Inflation Adjusted \$</b> |                    |                    |                    |
| 1                                                                                       |                    | -189.79 to 6.38    | -271.15 to 6.59    |
| 2                                                                                       |                    | 6.60 to 37.69      | 6.85 to 52.31      |
| 3                                                                                       |                    | 37.82 to 114.21    | 52.46 to 155.8     |
| 4                                                                                       |                    | 114.64 to 293.69   | 156.85 to 388.15   |
| 5                                                                                       |                    | 295.17 to 8647.54  | 390.04 to 7968.25  |
| <b><u>Birth cohort: 1936-1940</u></b>                                                   |                    |                    |                    |
| <b>Quintile</b>                                                                         | <b>50-54 years</b> | <b>55-59 years</b> | <b>60-64 years</b> |
| <b>Lower to Upper Bounds of Wealth Range for Each Quintile in Inflation Adjusted \$</b> |                    |                    |                    |
| 1                                                                                       | -581.45 to 5.91    | -482.187 to 7.41   | -263.1 to 6.61     |
| 2                                                                                       | 5.93 to 29.33      | 7.58 to 44.17      | 6.8 to 44.73       |
| 3                                                                                       | 29.67 to 80.84     | 44.24 to 120.12    | 45.16 to 144.35    |
| 4                                                                                       | 80.92 to 217.48    | 120.31 to 329.92   | 144.87 to 408.73   |
| 5                                                                                       | 218.41 to 14364.56 | 331.66 to 10692.02 | 409.29 to 17668.61 |
| <b><u>Birth cohort: 1941-1945</u></b>                                                   |                    |                    |                    |
| <b>Quintile</b>                                                                         | <b>50-54 years</b> | <b>55-59 years</b> | <b>60-64 years</b> |
| <b>Lower to Upper Bounds of Wealth Range for Each Quintile in Inflation Adjusted \$</b> |                    |                    |                    |
| 1                                                                                       | -168.51 to 5.97    | -129.36 to 7.56    | -106 to 8.17       |
| 2                                                                                       | 6.12 to 33.65      | 7.66 to 46.47      | 8.29 to 51.82      |
| 3                                                                                       | 33.99 to 98.63     | 46.6 to 136.57     | 52.06 to 176.71    |
| 4                                                                                       | 99.35 to 278.64    | 137.32 to 387.87   | 178.1 to 506.17    |
| 5                                                                                       | 280.96 to 22661.45 | 389.62 to 31698.76 | 508.43 to 34014.18 |
| <b><u>Birth cohort: 1946-1951</u></b>                                                   |                    |                    |                    |
| <b>Quintile</b>                                                                         | <b>50-54 years</b> | <b>55-59 years</b> | <b>60-64 years</b> |
| <b>Lower to Upper Bounds of Wealth Range for Each Quintile in Inflation Adjusted \$</b> |                    |                    |                    |
| 1                                                                                       | -118.28 to 7.3     | -173.75 to 6.28    | -299.64 to 2.59    |
| 2                                                                                       | 7.41 to 32.63      | 6.35 to 38.68      | 2.67 to 28.43      |
| 3                                                                                       | 33.35 to 108.5     | 40.13 to 138.83    | 29.2 to 121.76     |

|   |                   |                    |                   |
|---|-------------------|--------------------|-------------------|
| 4 | 109.15 to 320.77  | 140.96 to 398.21   | 121.94 to 422.93  |
| 5 | 327.06 to 9292.08 | 398.27 to 11218.14 | 423.74 to 7980.77 |

Wealth is given in thousands of dollars. Each participant was divided into quintiles based on their wealth at the time of survey response for each 5-year interval, stratified by birth cohort. Because each wealth quintile is specific for age of interview and birth cohort, the ranges presented for each quintile will vary. All numbers are adjusted for inflation and represented in 2012 US dollars.

**eTable 3.** Incidence Rates of Cardiovascular Events by Starting and Ending Wealth Quintile

| Starting Quintile | Person-years | # of Total Events | # of Non-Fatal CV Events | # of CV Deaths | Incidence Rate of Total Events (per 1000 py) | 95% Confidence Interval |
|-------------------|--------------|-------------------|--------------------------|----------------|----------------------------------------------|-------------------------|
| 1                 | 15148        | 232               | 167                      | 65             | 15.3                                         | 13.5-17.4               |
| 2                 | 17497        | 281               | 221                      | 60             | 16.05                                        | 14.3-18.1               |
| 3                 | 18295        | 261               | 220                      | 41             | 14.3                                         | 12.6-16.1               |
| 4                 | 20393        | 281               | 227                      | 54             | 13.8                                         | 12.3-15.5               |
| 5                 | 21583        | 281               | 252                      | 29             | 13.0                                         | 11.6-14.6               |
| Total             | 92916        | 1336              | 1087                     | 249            | 14.4                                         | 13.6-15.2               |
|                   |              |                   |                          |                |                                              |                         |
| Ending Quintile   | Person-years | # of Total Events | # of Non-Fatal CV Events | # of CV Deaths | Incidence Rate of Total Events (per 1000 py) | 95% Confidence Interval |
| 1                 | 14568        | 256               | 178                      | 78             | 17.6                                         | 15.5-19.9               |
| 2                 | 17124        | 266               | 212                      | 54             | 15.3                                         | 13.8-17.5               |
| 3                 | 18514        | 274               | 230                      | 44             | 14.8                                         | 13.1-16.7               |
| 4                 | 20463        | 266               | 225                      | 41             | 13.0                                         | 11.5-14.7               |
| 5                 | 22247        | 274               | 242                      | 32             | 12.3                                         | 10.9-13.9               |
| Total             | 92916        | 1336              | 1087                     | 249            | 14.4                                         | 13.6-15.2               |

**eTable 4.** Incidence Proportion of Nonfatal Cardiovascular Event or Cardiovascular Death by Wealth Quintile Change

|                    | Proportion of Non-fatal CV event or CV death | 95% Confidence Interval |
|--------------------|----------------------------------------------|-------------------------|
| -2 Quintiles       | 0.272                                        | 0.220 – 0.331           |
| -1 Quintiles       | 0.281                                        | 0.254 – 0.301           |
| No Quintile Change | 0.259                                        | 0.244 – 0.275           |
| +1 Quintiles       | 0.225                                        | 0.200 – 0.251           |
| +2 Quintiles       | 0.230                                        | 0.184 – 0.283           |

**eTable 5. Incidence Rates and Adjusted Hazards for Nonfatal Cardiovascular Event or Cardiovascular Death by Race**

|                                 | Events | Incidence Rates | Adjusted Hazard Ratios (95% CI) |                          |
|---------------------------------|--------|-----------------|---------------------------------|--------------------------|
|                                 |        |                 | Upward Wealth Mobility          | Downward Wealth Mobility |
| Overall<br>n = 5579             | 1336   | 14.38           | 0.88 (0.75-1.03)                | 1.20 (1.04-1.40)         |
| Non-Hispanic White<br>n = 4260  | 1053   | 14.92           | 0.86 (0.73-1.02)                | 1.21 (1.05-1.41)         |
| Non-Hispanic Black<br>n = 654   | 156    | 14.38           | 0.77 (0.49-1.21)                | 0.98 (0.63-1.52)         |
| Hispanic<br>n = 545             | 103    | 10.92           | 0.71 (0.40 – 1.25)              | 0.72 (0.43-1.23)         |
| Other race/ethnicity<br>n = 120 | 24     | 11.56           | 0.24 (0.04-1.23)                | 1.23 (0.31-4.87)         |

No statistical heterogeneity was observed in the relationships between relative wealth changes and CV events across racial/ethnic subgroups (all  $P_{interaction} > 0.10$ ).



**eFigure 1. Participant Selection Flow Diagram**

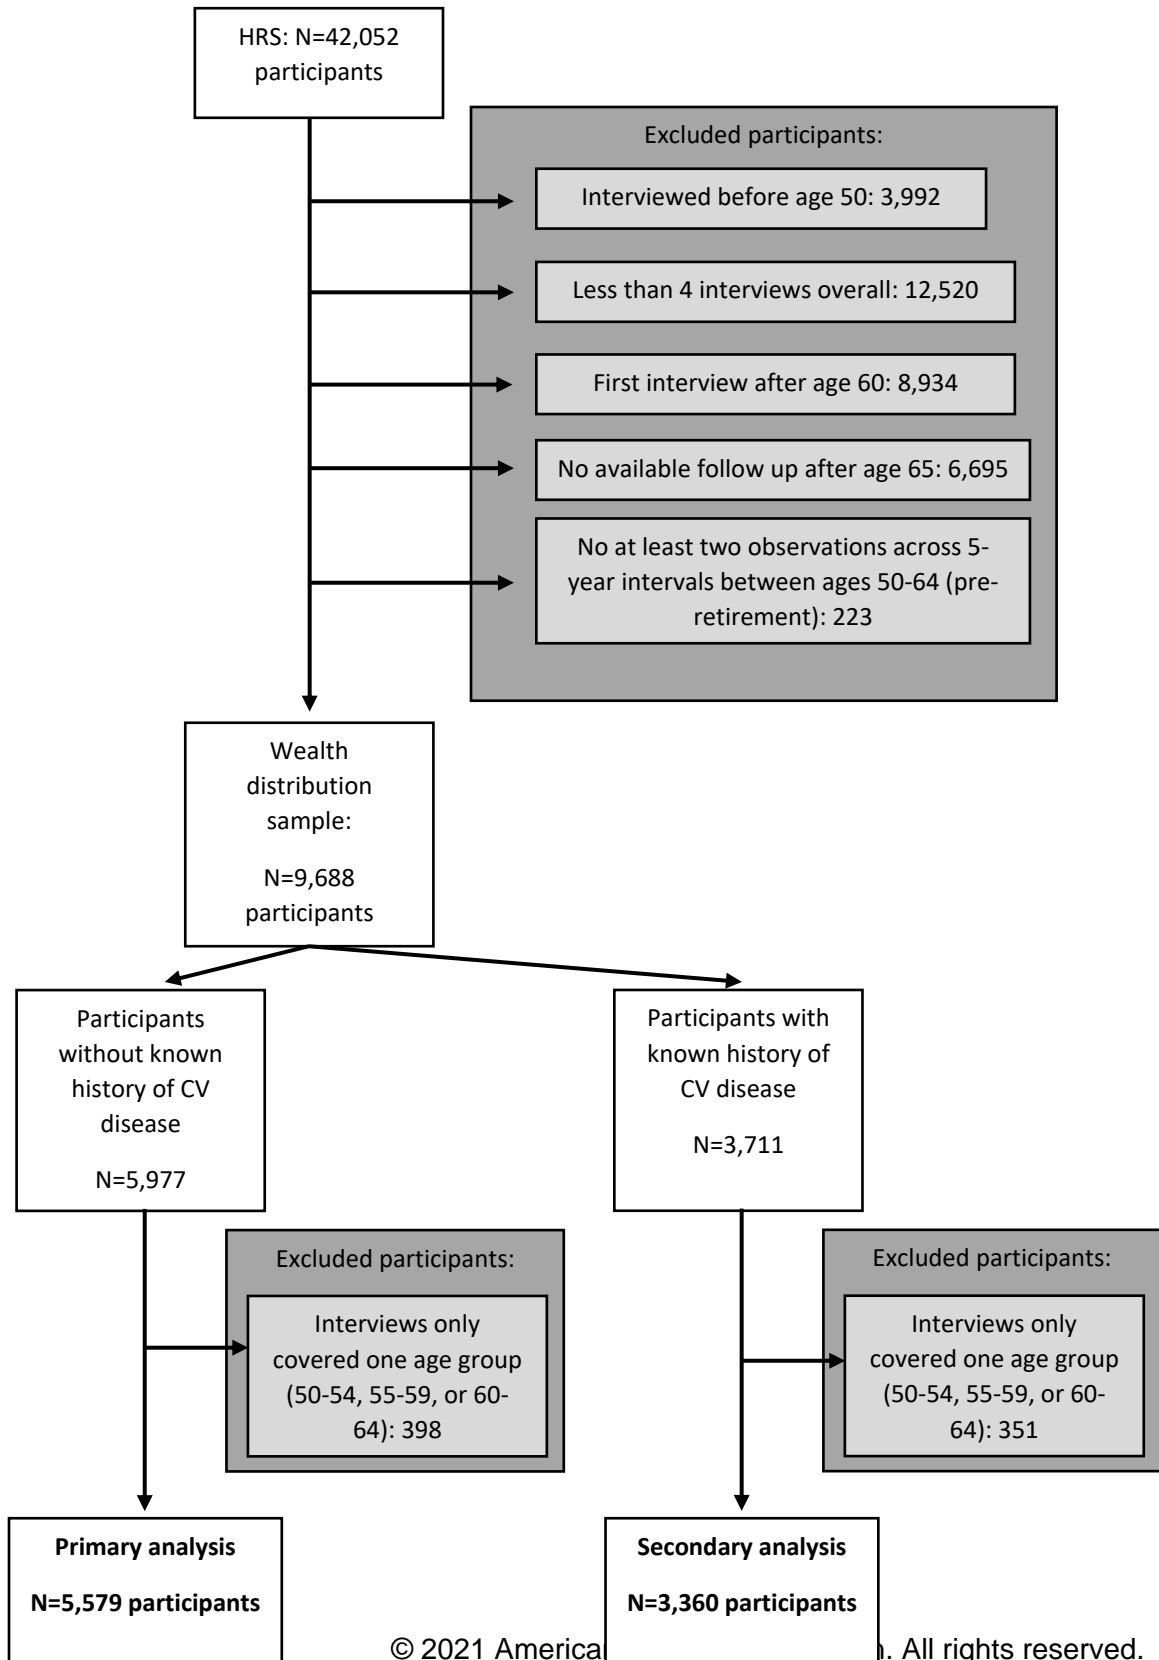

**eFigure 2.** Hazards of Nonfatal Cardiovascular Event or Cardiovascular Death by Magnitude of Wealth Mobility

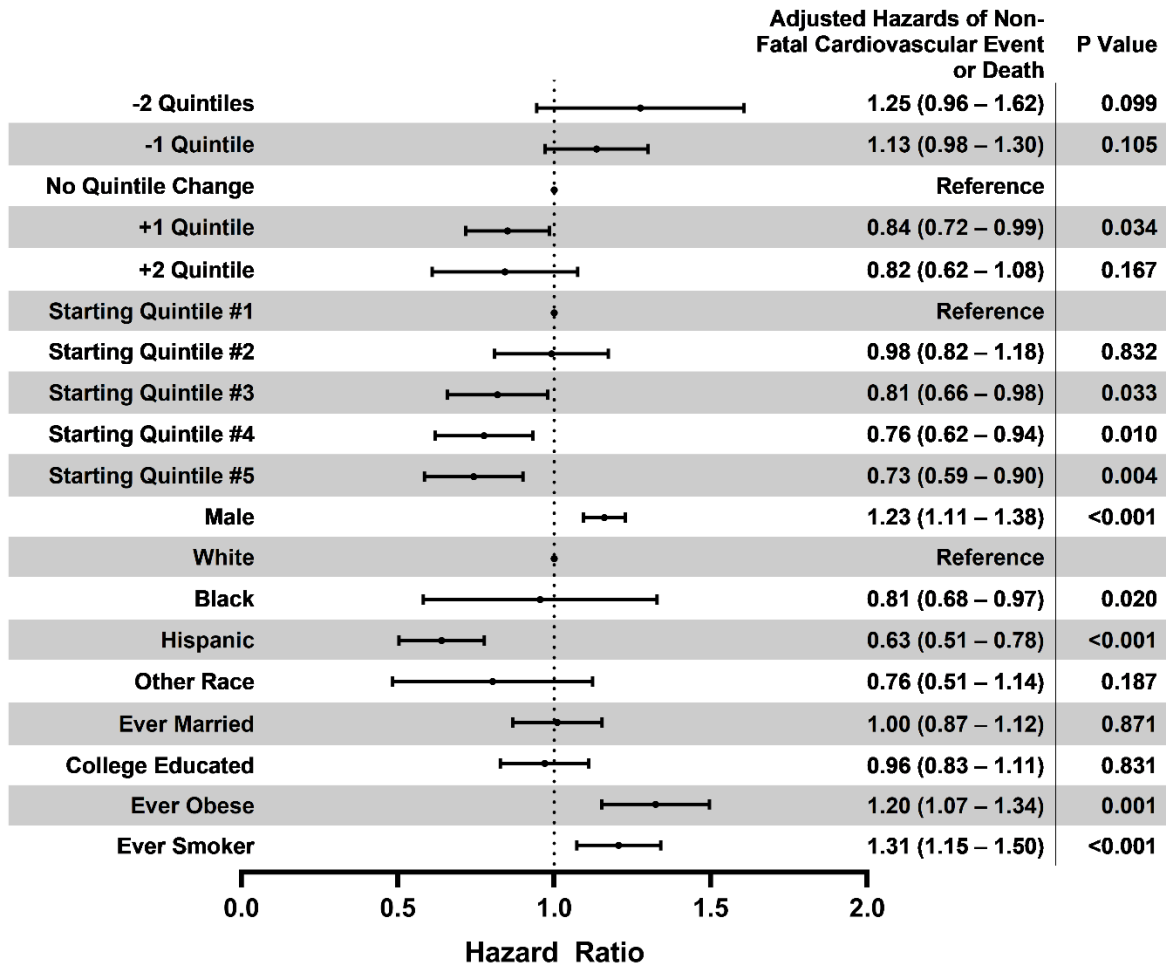

**eFigure 3.** Hazards of Total Absolute Wealth Change (Including Housing and Nonhousing Assets and Debts) and Nonfatal Cardiovascular Event or Cardiovascular Death

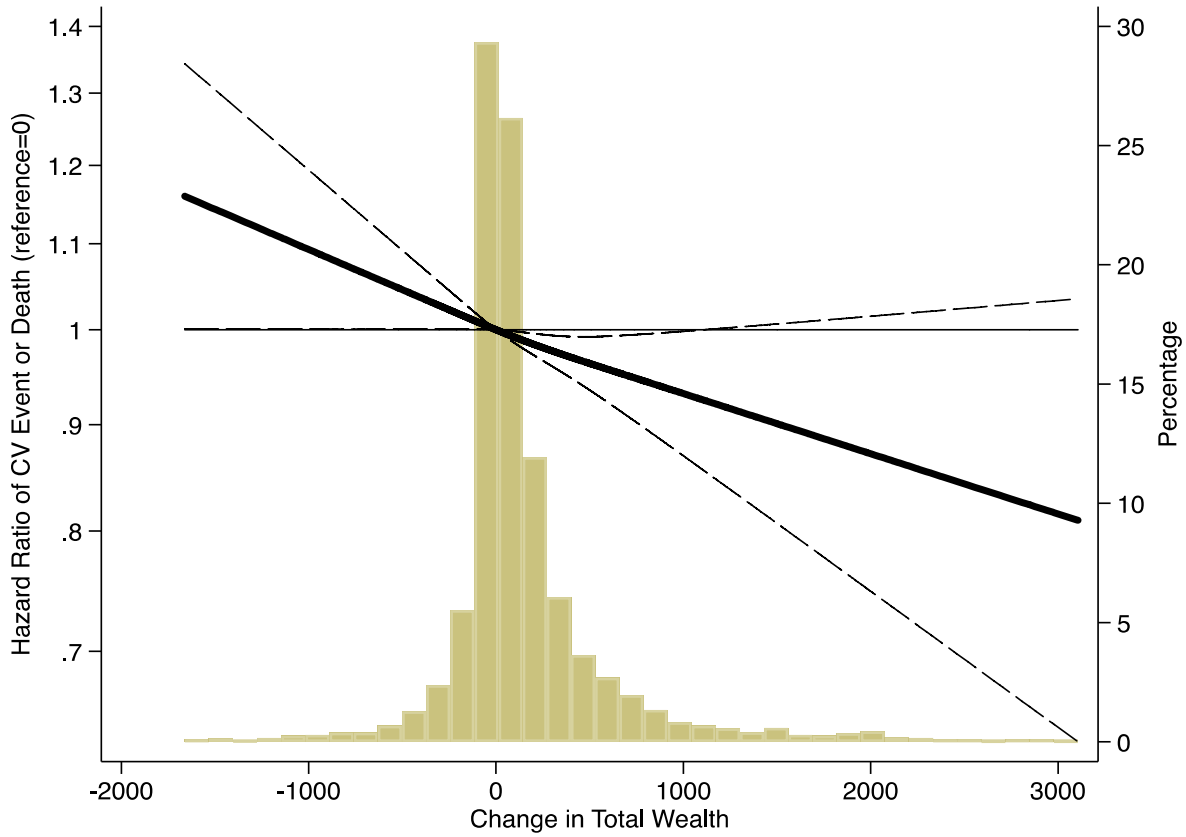

**eFigure 4.** Kaplan Meier Survival Curve for Freedom From Cardiovascular Death Alone Among Participants With and Without Upward Wealth Mobility

Survival Differences were compared using the log-rank test ( $P = 0.032$ )

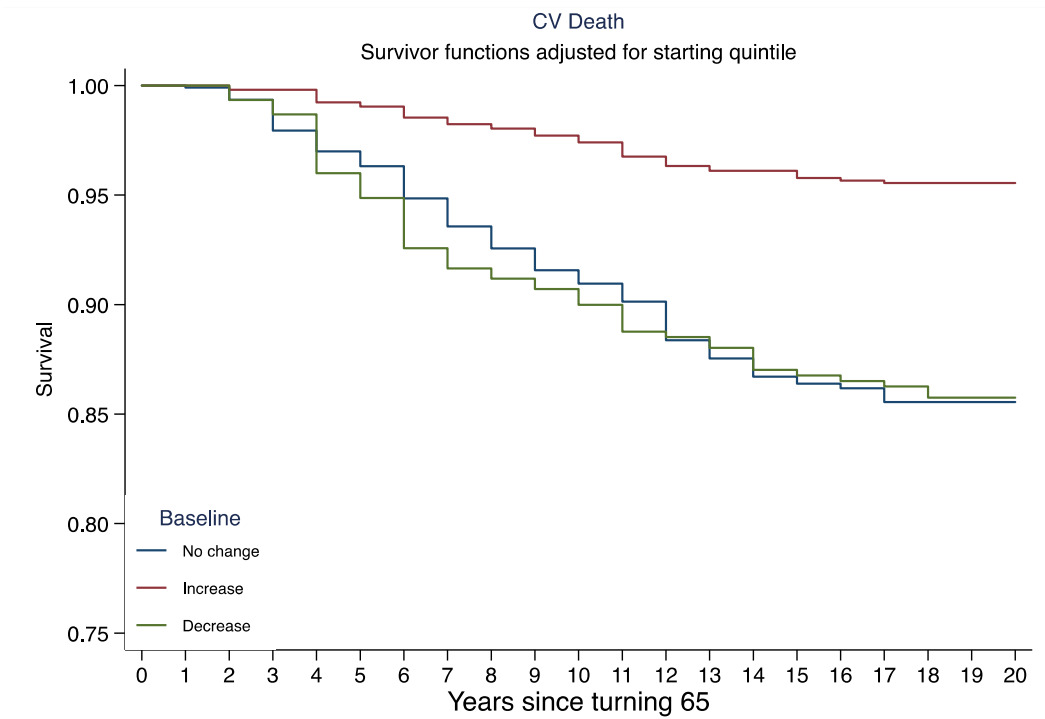

**eFigure 5.** Hazards of Cardiovascular Death by Wealth Mobility Among Participants With Cardiovascular Disease

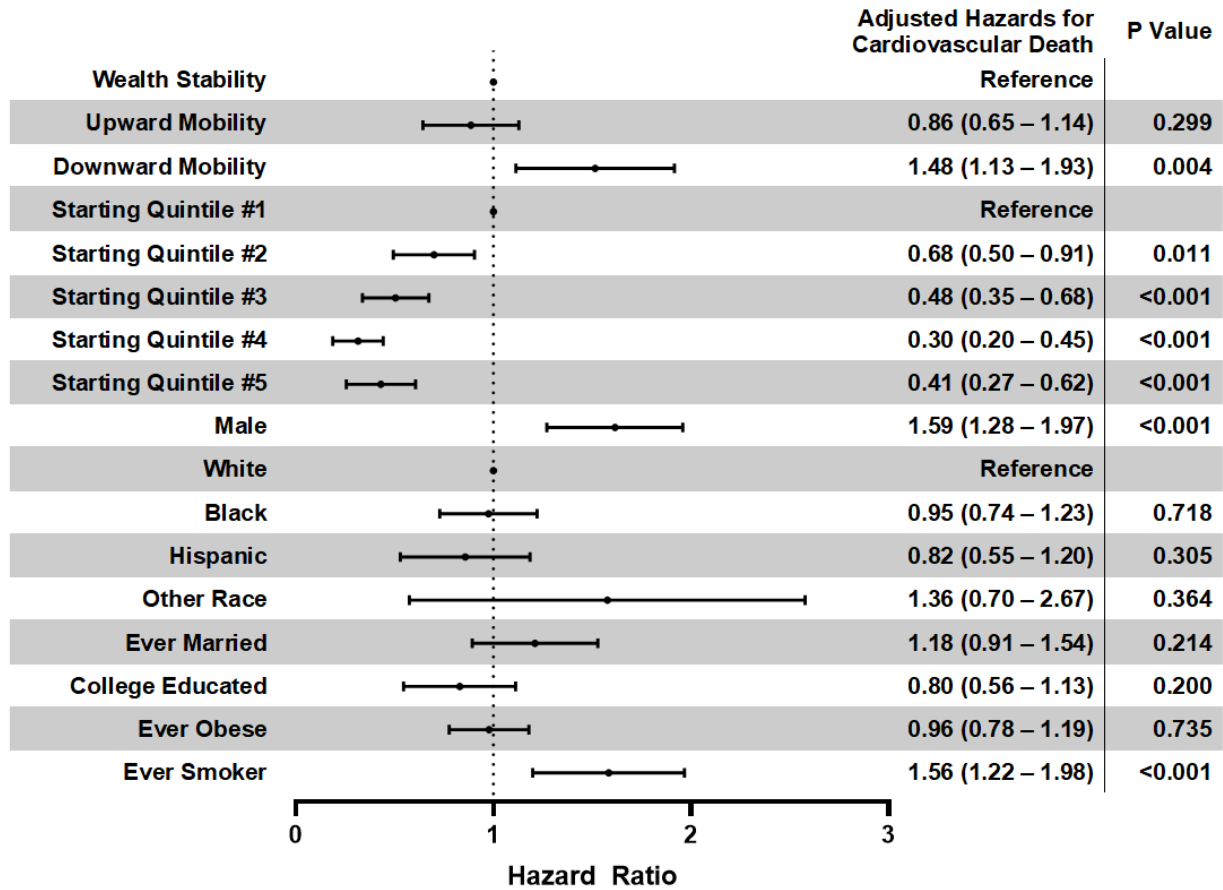

Supplement: jamacardiol-e212056-s001.pdf [file jamacardiol-e212056-s001.pdf]
